1 **Factors influencing riverine utilization patterns in two**  
2 **sympatric macaques**

3

4 Yosuke Otani<sup>1\*</sup>, Henry Bernard<sup>2</sup>, Anna Wong<sup>2</sup>, Joseph Tangah<sup>3</sup>, Augustine Tuuga<sup>4</sup>, Goro  
5 Hanya<sup>5</sup>, Ikki Matsuda<sup>3, 6, 7, 8</sup>

6 <sup>1</sup>*Center for the Study of Co\* Design, Osaka University, Toyonaka, Osaka 560-0043,*  
7 *Japan*

8 <sup>2</sup>*Institute for Tropical Biology & Conservation, University of Malaysia Sabah, Sabah,*  
9 *Malaysia*

10 <sup>3</sup>*Forest Research Centre, Sabah Forestry Department, Sandakan, Sabah*

11 <sup>4</sup>*Sabah Wildlife Department, Kota Kinabalu, Sabah, Malaysia*

12 <sup>5</sup>*Primate Research Institute, Kyoto University, Inuyama, Aichi, Japan*

13 <sup>6</sup>*Chubu University Academy of Emerging Sciences, Kasugai, Aichi, Japan*

14 <sup>7</sup>*Wildlife Research Center of Kyoto University, Kyoto, Japan*

15 <sup>8</sup>*Japan Monkey Centre, Inuyama, Japan*

16 <sup>\*</sup>*Corresponding author, email: [otani.primate.res@gmail.com](mailto:otani.primate.res@gmail.com) (Tel: +81-6-6210-8250)*

17

18 **Short title:** Riverine utilization patterns of two sympatric macaques

19 **Abstract**

20 Many species of terrestrial animals, including primates, live in varied association with  
21 the aquatic (e.g., riverine or coastal) environment. However, the benefits that each  
22 species receive from the aquatic environment are thought to vary depending on their  
23 social and ecological characteristics, and thus, elucidating those benefits to each species  
24 is important for understanding the principles of wild animal behaviour. In the present  
25 study, to gain a more complete picture of aquatic environment use, including social and  
26 ecological factors in primates, factors affecting riverine habitat utilization of two  
27 macaque species (*Macaca nemestrina* and *M. fascicularis*) were identified and  
28 qualitative comparisons were made with sympatric proboscis monkeys (*Nasalis*  
29 *larvatus*), which have different social and ecological characteristics. Temporal variation  
30 in sighting frequency of macaques at the riverbanks was positively related to the fruit  
31 availability of a dominant riparian plant species and negatively related to the river water  
32 level which affects the extent of predation pressure. Riverine utilization of macaques  
33 was greatly influenced by distribution and abundance of food (especially fruit)  
34 resources, possibly in association with predation pressure. Additionally, qualitative  
35 ecological comparisons with sympatric proboscis monkeys suggest that the drivers of  
36 riverine utilization depend on the feeding niches of the species, and different anti-  
37 predator strategies resulting from their differing social structures.

38

39 **Keywords**

40 Anti-predator strategy, aquatic environment, foraging strategy, landscape of fear,  
41 southern pig-tailed macaque

42

## 43 **Introduction**

44 Animals often live in forests characterized as mosaic habitats comprising both terrestrial  
45 and aquatic (e.g., riverine or coastal) environments while varying their associations with  
46 the aquatic environment. In addition to direct relationships such as obtaining food from  
47 the aquatic environment, e.g., bears eating salmon <sup>1</sup>; racoons eating mussels <sup>2</sup>, the aquatic  
48 environment has an indirect impact on terrestrial animals by bringing about  
49 environmental heterogeneity. Differences in terrestrial flora, which are due to varying  
50 water abundance and light intensity at the border between aquatic and terrestrial  
51 environments, affect foraging behaviour of animals that use plants as a food source. In  
52 addition, such boundaries restrict the distribution and movement patterns like a river-  
53 barrier <sup>3</sup> and thus are constraints on habitat utilization. Aquatic environments are,  
54 therefore, undoubtedly important for terrestrial animals across many taxonomic groups  
55 and geographic areas.

56 Primates are a primary example of terrestrial animals that rely on the aquatic  
57 environment. Kempf <sup>4</sup> presented a comprehensive review of primate aquatic behaviours  
58 with the conclusions that the use of aquatic resources and the aquatic environment affect  
59 various aspects of primate life, including feeding, traveling, predation avoidance, and  
60 thermoregulation, although it has been noted that the represented data are inadequate to  
61 draw strong conclusions. Reports of aquatic-related primate ecology have increased in  
62 recent years, strongly supporting such proposed broader trends with special reference to  
63 primates inhabiting flooded habitats <sup>5</sup>. One of the notable flooded habitats is riverine  
64 forest, providing a relatively constant availability of fruits, combined with greater plant  
65 diversity and higher leaf quality when compared with dryland forest, which is due to the  
66 frequent supply of nutrient-rich soils in riverine forests that are exposed to seasonal

67 flooding<sup>6,7</sup>. Further, in contrast to dryland forest, riverine forest potentially has a better  
68 light environment and more gap-specialists that have leaves containing higher protein  
69 content<sup>8</sup>—one of the important factors influencing primate abundance<sup>9</sup> and dietary  
70 choice e.g.,<sup>10,11</sup>. The distinctive food conditions caused by the presence of such large-  
71 scale riparian areas in forest habitat are likely to have a significant impact on primate  
72 behavioural ecology, and thus riverine habitat is an ideal forest type for research  
73 contributing to a fundamental understanding of primate behavioural ecology, including  
74 how the aquatic environment affects primate distribution and ranging behaviours.

75 Furthermore, studying habitats in riparian environments also plays an  
76 important role in understanding the landscape of fear<sup>12,13</sup>. Animals' responses to  
77 predation risk vary over time and space; for example, they can alter their behaviour,  
78 such as by changing time allocation patterns depending on the level of fear<sup>14</sup>.  
79 Boundaries between aquatic and terrestrial environments, e.g., riverbanks, can be  
80 advantageous or disadvantageous in anti-predator strategies, because they provide  
81 animals with a physically heterogeneous environment. In riverine habitats, river-edge  
82 trees in exposed places are preferred by primates for roosting to avoid predation,  
83 because this allows detection of approaching predators<sup>15-18</sup>. For example, proboscis  
84 monkeys (*Nasalis larvatus*) often choose sleeping sites in river-edge trees in areas with  
85 narrow river widths; this provides good escape routes from terrestrial predators such as  
86 clouded leopards (*Neofelis diardi*)<sup>19-21</sup>, which generally show a nocturnal activity  
87 pattern<sup>22</sup>. Conversely, on flooded days when water levels are extremely high, proboscis  
88 monkeys remain in inland forest because of reduced predation threat, as terrestrial  
89 predators are prevented from foraging on the forest floor<sup>23</sup>. Therefore, riverine forests  
90 have temporal and spatial environmental heterogeneity, and revealing the behavioural

91 changes of animals in response to such heterogeneity can provide insight into  
92 behavioural adaptation in response to fear of predators. Consequently, studying primates  
93 that live in riverine habitats is ideal for elucidating their resource exploitation patterns  
94 relative to anti-predator strategies; these are central components to understanding  
95 various primate habitat adaptations.

96 Long-tailed macaques (*Macaca fascicularis*) and southern pig-tailed macaques  
97 (*M. nemestrina*, hereafter pig-tailed macaques, unless otherwise noted) are widely  
98 distributed throughout the Sundaic region of Southeastern Asia, often coexisting in a  
99 broad variety of habitats<sup>24</sup>. Long-tailed macaques have often been reported sleeping in  
100 river-edge trees<sup>16,25,26</sup>, and van Schaik, et al.<sup>16</sup> indicate that multiple ecological factors  
101 (food availability, temperature and predation risk) influence their riverine utilization.  
102 Conversely, ecological data for pig-tailed macaques, including the northern species  
103 (*Macaca leonina*) and southern pig-tailed species, are less complete<sup>27-30</sup>, and their  
104 aquatic-related behaviours are rarely reported. Rodman<sup>31</sup> reported that microhabitat  
105 segregation occurs between the two species and that, unlike long-tailed macaques, pig-  
106 tailed macaques generally do not use riverine areas. Conversely, Albert, et al.<sup>18</sup> noted  
107 that the preference of northern pig-tailed macaques to locate their sleeping sites in river-  
108 edge trees was a part of their predator avoidance strategy. In addition to predation  
109 pressure, as in long-tailed macaques, food availability may affect riverine utilization in  
110 pig-tailed macaques. By determining the effects of food availability on riverine forest  
111 use in macaque habitat, it is possible to evaluate whether the ranging behaviour of pig-  
112 tailed macaques is affected by food availability in the same way as that of long-tailed  
113 macaques.

114 We examined the riverine habitat utilization patterns of sympatric long-tailed

115 and pig-tailed macaques inhabiting a secondary riverine forest on the island of Borneo.  
116 At this site, it has been reported that sympatric primates, including the two study  
117 macaque species, proboscis monkeys and other species, prefer to utilize river-edge trees  
118 for night-time sleeping, although the frequency of riverine usage is different among  
119 these sympatric primates<sup>32</sup>. A previous study on proboscis monkeys at the site  
120 suggested that riverine preference is related to high predation pressure, but not river-  
121 edge dietary choice<sup>17,23</sup>. However, in theory, predation risk varies with group size and  
122 body weight<sup>33-35</sup>. The two species of macaques in this study may have different anti-  
123 predator strategies from proboscis monkeys, as the macaques live in groups of multiple  
124 males and females and have larger group sizes than proboscis monkeys, which live in  
125 groups consisting of one male and multiple females<sup>35,36</sup> and have significantly different  
126 body weight than the two macaque species, i.e., proboscis monkey: male, 25kg and  
127 female, 14 kg; long-tailed macaque: male, 6 kg and female, 4 kg; pig-tailed-macaque,  
128 male, 14 kg and female, 7 kg<sup>37-39</sup>. Additionally, the ranging behaviour of primate  
129 species that prefer to feed on patchy and clumped food sources, e.g., fruits and flowers,  
130 such as northern pig-tailed and long-tailed macaques<sup>16,25,26</sup>, is more influenced by food  
131 distribution and abundance than that of primate species that prefer to feed on ubiquitous  
132 food sources (i.e., leaves), such as proboscis monkeys<sup>40</sup>. Therefore, for macaques, the  
133 location of foraging patches may have a stronger effect on sleeping site selection.

134 In the present study, to gain a more complete picture of the riverine utilization  
135 patterns in the two species of sympatric macaques, we sought to 1) evaluate temporal  
136 variation in their riverine usage and assess the factors affecting riverine usage, including  
137 physical environment, i.e., river width and water level, and 2) describe their diets in  
138 river-edge areas, with a comparison of those availability. In addition, the effects of

139 feeding niches and social structure on ranging behaviour are discussed by qualitatively  
140 comparing the characteristics of riverine utilization of the two species of macaques with  
141 those of proboscis monkeys reported in previous studies<sup>17,21,23</sup>.

142

## 143 **Methods**

### 144 **Study area and subjects**

145 We performed the observations over two years from 2012 to 2014 in riverine forests along  
146 the Menanggul River (average river width 0–4000 m from the river mouth: 19.9 m), a  
147 tributary of the Kinabatangan River, Sabah, Borneo, Malaysia (118°30'E, 5°30'N). The  
148 south side of the Menanggul River is covered extensively in natural forest, whereas the  
149 north side has been deforested for oil palm plantations, except for a protected zone along  
150 the river<sup>41</sup>. The mean minimum and maximum daily temperatures were approximately  
151 24°C and 30°C, respectively, and the mean annual precipitation at the site was 2,474 mm  
152<sup>6</sup>. The riverine forest was inhabited by long-tailed and pig-tailed macaques, as well as  
153 proboscis monkeys, silver langurs (*Trachypithecus cristatus*), Hose's langurs (*Presbytis*  
154 *hosei*), maroon langurs (*Presbytis rubicunda*), Bornean gibbons (*Hylobates muelleri*) and  
155 orangutans (*Pongo pygmaeus*)<sup>32</sup>. Long-tailed and pig-tailed macaques under observation  
156 were well habituated to observers in boats, as this area is one of the main tourist attractions  
157 in the region, with many boats and tourists visiting the Menanggul River since more than  
158 10 years ago.

159

### 160 **Data collection**

#### 161 *Boat-based surveys*

162 Surveys by boat in the late afternoon are considered the most effective method for

163 studying primates, including the two sympatric macaques in this region, because they  
164 often sleep in riverside trees<sup>32</sup>. We therefore collected data on the distribution pattern of  
165 the sympatric macaques in the late afternoon (16:00–19:00) for 434 days from June 2012  
166 to July 2014 via boat-based surveys. We conducted the surveys along the river at a speed  
167 of approximately 4–6 km/h. When we detected a group or individual macaque, we  
168 switched off the boat engine to avoid disturbing them and paddled closer to record their  
169 species and numbers. We divided the river into 50-metre sections from the river mouth to  
170 4,000 m inland, recording the river sections where sightings of macaques were made.  
171 When group members were distributed over several sections, the section containing the  
172 largest number of individuals in the visual inspection was defined as the detected section.

173

#### 174 *Boat-based behavioural observations*

175 We collected behavioural data from the adults and subadults in both macaque species  
176 during the boat-based surveys. During the observation periods, we recorded the activity  
177 of all visible primates at the time of detection by scan sampling<sup>42</sup> over 60 days from June  
178 2012 to May 2014. We divided the behaviours into seven categories: feeding, grooming,  
179 moving, resting, playing, fighting and other. Food items consisted of leaves, fruits,  
180 flowers and other items, and food plants were taxonomically identified *in situ*.

181

#### 182 *Vegetation survey*

183 We established a total of 16 transects (200–500 m × 3 m) on both sides of the river at 500  
184 m intervals from the river mouth to 4,000 m. The total length of the 16 transects was  
185 7,150 m, and the total surveyed area was 2.15 ha. We taxonomically identified trees ≥10  
186 cm in diameter at breast height (DBH) and vines ≥5 cm in diameter that were located



187 within the transects<sup>6</sup>. Because these data did not include herbaceous climbers, we added  
188 data on *Cayratia trifolia* (Vitaceae), an important food source for macaque species (see  
189 results) in case the climber was entangled in the surveyed trees/vines.

190

#### 191 *Monthly availability survey for C. trifolia fruits*

192 We carried out a fruit quantity survey of *C. trifolia*, which has fleshy, juicy, dark purple  
193 and nearly spherical fruits ca. 1 cm in diameter<sup>43</sup>. It has been reported that sympatric  
194 proboscis monkey at this study site consume *C. trifolia*<sup>40</sup>. Early in each monthly survey  
195 from July 2012 to June 2014, we travelled by boat up to 4000 m from the river mouth and  
196 counted all the visible mature and young fruits of *C. trifolia* on both riverbanks. Two  
197 observers independently counted the number of fruits in a section, and the average was  
198 defined as the availability of *C. trifolia* in the section. We judged the degree of fruit  
199 maturation by its colour, with mature fruit being purple to black and young fruit being  
200 green.

201

#### 202 *Rainfall, water level and river width*

203 We measured daily rainfall every morning at base camp approximately 1.5 km from the  
204 mouth of Menanggul River, using a tipping bucket rain gauge. We also recorded water  
205 level and river width to evaluate the effects of river level on behaviours of the study  
206 macaques. We installed a water level gauge at the mouth of Menanggul River, and  
207 measured the water level at the end of the boat-based survey (17:00–19:00). We  
208 measured the river width at the start and end points of each 50 m section with a laser  
209 rangefinder, and the average value of the start and end points was used as a  
210 representative value of the river width of the section.

211

212 *Data analysis*

213 To extract time-series characteristics of the increase or decrease in the number of *C.*

214 *trifolia* fruit, we conducted seasonal decomposition of time series by loess (STL) <sup>44</sup>

215 which is a filtering procedure for decomposing a seasonal times series into three

216 components: trend, seasonal, and remainder or residual.

217 We evaluated the effects of the availability of *C. trifolia* fruits, rainfall and river

218 width on the sighting frequency of the two macaque species counted during the boat-

219 based surveys, using a hierarchical Bayesian continuous-time structural equation model

220 (CtSEM). Models were fitted using the R package ctsem ver. 2.5.0 <sup>45</sup> with four chains

221 and 4,000 iterations. The CtSEM modelling addresses unequally spaced time intervals

222 in longitudinal data assessment. Since the number of survey days varied between

223 months and the survey days were not evenly spaced, the monthly mean values were not

224 strictly equally spaced time interval data. Through a hierarchical Bayesian framework,

225 CtSEM allows for the estimation of continuous time processes of a sample while

226 accounting for potential subject-level deviations by using population model estimates to

227 inform subject-level model priors <sup>46</sup>. The possible temporal autocorrelations among our

228 data are the total amount of *C. trifolia* fruits, and the monthly mean number of counted

229 macaques on each day. In addition, since there is a possibility that spatial

230 autocorrelation occurs between adjacent 50 m sections, the 500 m section was adopted

231 for examination of factors for sightings of macaques on riverbanks. As a result of the

232 evaluation of the spatial autocorrelation by Moran's *I* index, which is the most

233 commonly used coefficient in univariate autocorrelation analyses, such a trend was not

234 detected at each 500 m section for the monthly sighting frequency of the macaques, i.e.,

235 mean monthly number of counted pig-tailed (Moran *I* statistic index =  $-0.324 - 0.115$ ,  
236  $p > 0.3$ ) and long-tailed macaques (Moran *I* statistic standard deviate =  $-0.299 -$   
237  $-0.085$ ,  $p > 0.2$ ), and availability of *C. trifolia* fruits (Moran *I* statistic standard deviate  
238 =  $-0.224 - 0.101$ ,  $p > 0.2$ ). This indicates that the 500 m section is a unit that can be  
239 analysed without considering spatial autocorrelation and is a suitable analytical unit for  
240 subsequent analysis. Predictor and independent variables were z-standardized to build a  
241 common metric. We performed the calculations using R ver. 3.6.1<sup>47</sup>. In the  
242 representation of the result of the model, SD refers to posterior standard deviation and  
243 PCI refers to posterior credibility intervals. The PCI indicates the probability that the  
244 parameter falls between the lower (2.5%) and upper (97.5%) limits.

245

## 246 **Results**

### 247 **Boat-based survey: sighting frequency of primates and consumed food items**

248 During the study period, there were a total of 3,180 detection events for six species of  
249 primates, and 39,907 individuals were observed during boat-based surveys (Table 1).  
250 Long-tailed and pig-tailed macaques accounted for 37.0% and 25.7% of the total  
251 number of observed individuals, respectively (Table 1). We collected a total of 66 and  
252 277 feeding records for pig-tailed and long-tailed macaques, respectively. Fruits and  
253 flowers/buds of *C. trifolia* and *Dillenia excelsa* were by far the most important foods at  
254 the riverbanks, which constituted 22.7%, and 50.9% (*C. trifolia*), and 42.4% and 18.8%  
255 (*D. excelsa*) of the total feeding records in pig-tailed and long-tailed macaques,  
256 respectively (Table 2).

257

258 **Vegetation characteristics and food availability**

259 We marked 1,645 trees and 497 vines (180 species, 125 genera, 52 families) along our  
260 16 trails (for details, see <sup>6</sup>). *Cayratia trifolia* was entangled in only four of 1,645 marked  
261 trees (0.24%), and was located in well-lit forest gaps caused by fallen trees. Conversely,  
262 *C. trifolia* was clearly more abundant along the riverbanks, and was found in 12.5%–  
263 72.5% of all 50-m river sections in each monthly survey. Contrary to the distribution  
264 pattern of *C. trifolia*, *D. excelsa* was more abundant inside the forest: of 98 *D. excelsa*  
265 plants in the vegetation transects, 84 (86%) were found in the inland forest (>50 m from  
266 the riverbanks). The tendency was the same for *Mallotus muticus* (120 of 149 in the  
267 inland forest), which was the third most common plant in feeding records of pig-tailed  
268 and long-tailed macaques; *Albizia corniculata* (22 of 28 in the inland forest) and *Ficus*  
269 spp. (20 of 23 in the inland forest), which were the fourth and fifth most common in the  
270 feeding records of pig-tailed macaques; and *Antidesma thwaitesianum* (27 of 28 in the  
271 inland forest) and *Xylosma sumatrana* (53 of 67 in the inland forest), which were the  
272 fourth and fifth most common in the feeding records of long-tailed macaques.

273 The mean monthly number of counted *C. trifolia* fruits on the riverbanks was  
274 23,283.7 (SD  $\pm$ 19,707.3; range 1,844–78,505). The mean monthly numbers of young and  
275 mature fruits were 22,795.0 ( $\pm$ 19,260.0; 1,806–76,002) and 488.6 ( $\pm$ 572.4; 38–2,503),  
276 respectively. STL based on the number of counted fruits in each monthly survey clarified  
277 that the *C. trifolia* fruit availability seasonally fluctuated (Fig. 1). Fruit availability  
278 declined in the middle of 2013 and then increased again, and tended to increase and  
279 decrease every 4–6 months.

280

281 **Factors affecting temporal variation in sighting frequency of macaques**

282 The mean and 95% PCI of  $T_0$  mean parameters (Table 3), representing the relationship  
283 between the subject's initial states with their later states throughout the latent process,  
284 were 0.408 (-0.089, 0.911), 0.313 (-0.199, 0.783) and 0.270 (-0.230, 0.805) for the  
285 sighting frequency of pig-tailed and long-tailed macaques and *C. trifolia* fruits,  
286 respectively. This indicated that there was no tendency for each parameter to increase or  
287 decrease substantially over time, because for all parameters zero falls within the PCIs.  
288 The manifest mean parameters (Table 3) represent the average level of the processes,  
289 reflecting the intercepts of the sighting frequency of pig-tailed and long-tailed macaques  
290 and availability of *C. trifolia* fruits.

291 The regression coefficients of the monthly mean sighting frequency of  
292 macaques and monthly availability of *C. trifolia* fruits within each section denoted the  
293 temporal autoregressive effects (Fig. 2); *C. trifolia* fruits had a temporal autocorrelation  
294 that lasted approximately three months, but sighting frequency of macaques had no such  
295 autocorrelation.

296 To assess the effects of the monthly availability of *C. trifolia* fruits on the  
297 monthly mean sighting frequency of pig-tailed and long-tailed macaques, we evaluated  
298 the drift parameters representing the cross effects (Table 3). The positive values showed  
299 that the *C. trifolia* fruits had a positive effect on the sighting frequency of pig-tailed  
300 (mean = 1.560, SD = 0.653, PCI = [0.131, 2.710]) and long-tailed (mean = 0.850, SD =  
301 0.148, PCI = [0.581, 1.168]) macaques throughout the study period, indicating that  
302 more macaques were sighted in areas where *C. trifolia* fruits were abundant.  
303 Conversely, the sighting frequency of macaques did not affect the availability of *C.*  
304 *trifolia* fruits. Additionally, the positive values indicated that the sighting frequency of

305 both macaques had positive effects on each other (pig-tailed to long-tail macaques,  
306 mean = 0.984, SD = 0.367, PCI = [0.356, 1.802]; long-tailed to pig-tailed macaques,  
307 mean = 0.753, SD = 0.281, PCI = [0.272, 1.373]).

308 Of the time-dependent/independent variables, we detected neither significantly  
309 positive nor negative effects of the monthly rainfall or river width on the mean monthly  
310 sighting frequency of both macaque species and the availability of *C. trifolia* fruits,  
311 while the water level had a negative effect on those factors (Table 3).

312

## 313 **Discussion**

314 We found that ecological factors influenced the riverine habitat utilization of the two  
315 sympatric macaque species in this study. One of the important factors was the availability  
316 of *C. trifolia*, which was also the most consumed plant species by the macaques; their  
317 temporal variation in sighting frequency at the riverbanks was positively related to the  
318 abundance of *C. trifolia* fruits. Conversely, a previous study of proboscis monkeys at this  
319 study site reported that food availability is not a fundamental factor for explaining their  
320 riverine habitat utilization patterns in the late afternoon<sup>17</sup>. Differing dietary preference in  
321 relation to the digestive physiology between the two macaque species and proboscis  
322 monkeys may have created this inconsistency. Hindgut-fermenting primates (e.g.,  
323 macaques) generally show a stronger preference for fruits than foregut-fermenting  
324 primates (e.g., proboscis monkeys), allowing the latter to exploit a diet of leaves in greater  
325 quantities<sup>48,49</sup>. Indeed, *C. trifolia* fruits are not the most preferred food by proboscis  
326 monkeys at this study site<sup>40</sup>.

327 Predation pressure may also be a factor that affects riverine habitat utilization  
328 patterns for the two macaque species in this study, which was also shown for proboscis

329 monkeys<sup>17</sup>. The landscape of fear is an important driver of prey habitat utilization<sup>50</sup>.  
330 Although it is generally difficult to evaluate predation pressure on primates because of  
331 how rare it is to directly observe cases of attempted or successful predation<sup>34,51</sup>,  
332 behavioural responses to predator presence were reported to have more far-reaching  
333 consequences for prey ecology than the actual killing of individuals<sup>12</sup>. Indeed, despite  
334 the abundance of food resources when studying these macaques, their use of riverbanks  
335 was mainly limited to the late afternoon<sup>17,32</sup>; one reason for this could be related to their  
336 nocturnal anti-predator strategy.

337         According to previous reports<sup>20,25,30,52-54</sup>, clouded leopards (*Neofelis diardi*),  
338 crocodiles (*Crocodylus porosus* and *Tomistoma schlegeli*), and pythons (*Python* spp.) may  
339 be significant potential predators of macaques of any age or sex at this study site. It was  
340 previously reported that proboscis monkeys were attacked by clouded leopards when they  
341 were in trees<sup>19</sup>. Therefore, the studied macaques should also be exposed to a threat of  
342 predation by clouded leopards, which generally show a strongly nocturnal activity pattern  
343<sup>22</sup>, when the macaques sleep in trees during the night time; during this time, there is no  
344 predation threat from crocodiles. As pythons also tend to move and search for prey during  
345 the night, even in trees<sup>55</sup>, threats of predation on macaques by pythons may be similar to  
346 those by clouded leopards and may be predictable.

347         Riverine habitat utilization in the late afternoon and during sleeping periods at  
348 night provides more effective protection against attacks from terrestrial predators such as  
349 clouded leopards, because they can only approach the macaques from the landward side.  
350 Indeed, several studies reported the use of riverine refugia by long-tailed and northern  
351 pig-tailed macaques<sup>16-18</sup>, possibly to reduce predation risk from such terrestrial predators.  
352 Alternatively, the openness of the river banks may pose another problem: vulnerability to

353 predation by raptors. However, raptors that prey on adult diurnal primates are considered  
354 to be absent from Southeast Asia<sup>56</sup>, probably because there are few large raptor species  
355<sup>57</sup>. According to literature reviews<sup>58,59</sup>, in the case of immature primates (e.g., infants and  
356 juveniles), potential predators in the study area may include raptors such as black eagles  
357 (*Ictinaetus malayensis*), crested serpent-eagles (*Spilornis cheela*), and bat hawks  
358 (*Macheiramphus alcinus*)<sup>19</sup>. However, predation upon any primates by these animals was  
359 not seen at the study site; thus, their predation pressure on macaques may be less  
360 prominent. Therefore, late afternoon and night-time use of the riverbanks by macaques  
361 may be a response to fear of nocturnal predators. Further studies that include longer-term  
362 direct observations and nocturnal observations would provide direct data on predation  
363 (e.g., capture rate, loss rate of group members, and contextual data such as age, sex, and  
364 social status of prey) and degree of fear of macaques (e.g., vigilance behaviour inland and  
365 on river banks). Such information could provide explicit insight into the nature of the  
366 landscape of fear.

367 Contrary to the anti-predator strategy observed in proboscis monkeys, in which  
368 they select sleeping sites in areas with narrow river widths<sup>19,20</sup>, river width was not a  
369 significant factor that predicted the sighting frequency of macaque species at the  
370 riverbanks in this study. Although the two species of macaques were rarely observed  
371 swimming in the river during this study, river crossing at narrower river sections have  
372 been more commonly observed in proboscis monkeys<sup>21,60</sup>; this may be why river width  
373 was not detected as a significant factor for the macaques. Both macaque species live in  
374 larger groups with more males than proboscis monkeys<sup>35,36</sup>, and larger groups are  
375 generally more vigilant and are capable of detecting predators from longer distances,  
376 which potentially reduces predation risk<sup>33,61</sup>. Therefore, the benefit of sleeping on the



377 riverbanks for the macaques may simply be the vantage point for detecting approaching  
378 terrestrial predators like clouded leopards and pythons, rather than ease of crossing the  
379 river. Additionally, to gain a better understanding of our riverine anti-predator hypothesis,  
380 further studies should evaluate the differences and similarities of predation vulnerability  
381 levels between the two macaque species in terms of their differences in  
382 arboreality/terrestriality levels and riverine utilization frequency on the basis of accurate  
383 population density estimates in the habitat. Furthermore, many studies emphasized the  
384 importance of food resource proximity for sleeping site choice by various primate species  
385 e.g.,<sup>18,30,62,63-66</sup>. We do not deny the possibility that selecting sleeping sites on riverbanks  
386 may also have a secondary effect of minimizing the macaques' foraging and traveling  
387 costs by sleeping near their feeding areas (i.e., areas abundant in *C. trifolia*).

388         Echoing our observation of the negative effect of river level on macaque sighting  
389 frequency at the riverbanks, Matsuda, et al.<sup>23</sup> noted such an effect in proboscis monkeys  
390 at this study site; they suggested that this occurred because of reduced predation threats,  
391 as terrestrial predators such as clouded leopards are prevented from foraging by deep  
392 water covering the forest floor. For the macaques, the negative effect of river level could  
393 be caused by decreased attractiveness of the dominant food resources on the riverbanks.  
394 Because *C. trifolia* was mostly distributed along lower parts of the riverbanks at this study  
395 site, these plants were under water or near the surface of the river when the water level  
396 was high. The macaque species in this study may hesitate to forage for *C. trifolia* fruits  
397 under such circumstances because of the risk of aquatic predator attacks, despite the  
398 reduced terrestrial predator threat due to high-level river water. Indeed, while feeding on  
399 *C. trifolia* fruits on low branches (1–3 m above the river), an adult male long-tailed  
400 macaque was preyed upon by an estuarine crocodile (*Crocodylus porosus*)<sup>20</sup> at our study

401 site. As a result, the increased risks associated with *C. trifolia* foraging because of aquatic  
402 predators may have diminished the value of *C. trifolia* as a food resource, and this led to  
403 a low sighting frequency of the macaques. Additionally, high water levels may simply  
404 make access to the riverbanks more difficult for both macaque species, although this is  
405 unlikely: both macaque species were affected by water level, even though long-tailed  
406 macaques are more arboreal than pig-tailed macaques <sup>67</sup>.

407 This study showed that riverine utilization by pig-tailed and long-tailed  
408 macaques was greatly influenced by temporal variation in food resource abundance and  
409 predation pressure. In addition, qualitative comparisons of sympatric proboscis monkeys  
410 suggested that the drivers of riverine utilization depend on the feeding niches of the  
411 species and variations in how they cope with predation pressure due to differences in  
412 behavioural patterns and social structure. The sighting frequency of both macaques in the  
413 riverine habitat had a positive effect, and their dietary patterns in the riverine habitat were  
414 similar; this indicated that their feeding niche separation is ambiguous, especially on the  
415 riverbanks, although microhabitat segregation has been reported in these two closely  
416 related, coexisting macaque species in East Kalimantan <sup>26,31</sup>.

417 It should be noted, however, that we cannot deny the possibility of the  
418 microhabitat segregation of these two macaque species in the inland habitat where they  
419 were not observed for this study. Co-occurrence of these two macaque species on the  
420 riverbanks at our study site may be due to the distinctive distribution of the food resource  
421 *C. trifolia*. In fact, the sighting frequency of the macaques had no effect on the subsequent  
422 abundance of *C. trifolia* fruits. This indicates that the fruits were super-abundant;  
423 therefore, the effect of foraging by macaques on fruit abundance was nearly negligible.  
424 The presence of super-abundant food would mitigate feeding competition and allow the

425 two macaque species to co-occur on the riverbanks. Tracking macaque groups into the  
426 inland forest during other times of the day would reveal the importance of riverine  
427 habitats in the diet of these species and provide further insights into the mechanisms of  
428 coexistence. In addition to feeding competition, future studies should evaluate the effects  
429 of competition for sleeping trees to elucidate coexistence mechanisms in sympatric  
430 macaques, as we observed the two macaque species both sharing a sleeping tree and  
431 competing for a sleeping tree.

432

### 433 **Acknowledgments**

434 We thank the Sabah Biodiversity Centre and the Sabah Wildlife Department for granting  
435 permission to carry out this research and our research assistants, especially Shah, Asnih,  
436 Jasrudy, and the Sabah Forestry Department for support in the field. We appreciate the  
437 support of Dr. K. Fukaya in terms of statistical analyses. We thank Clio Reid, PhD, from  
438 Edanz Group (<https://en-author-services.edanzgroup.com/ac>) for editing a draft of this  
439 manuscript. Finally, we thank Dr. Julie Teichroeb (handling editor) and two anonymous  
440 reviewers for their constructive comments which improved our manuscript. The animals  
441 involved in this study were not handled for this study. This study was performed  
442 following the Research Guidelines for the Study of Wild Primates of the Primate  
443 Research Institute, Kyoto University and in compliance with applicable Malaysian laws.

444

### 445 **Funding**

446 This study was partially funded by the HOPE and Human Evolution Project of KUPRI,  
447 a MEXT Grant-in-Aid for JSPS Fellows to YO (#11J04699), JSPS KAKENHI  
448 (#26711027, # 19KK0191 and # 19H03308 to IM; # 22687002 to GH), publication

449 support program of Osaka University and Japan Science and Technology Agency Core  
450 Research for Evolutional Science and Technology 17941861 (#JPMJCR17A4). This  
451 project has also benefitted funding from the JSPS Strategic Young Overseas Visits  
452 Program for Accelerating Brain Circulation (S2508, PI: Hirohisa Hirai).

453

#### 454 **Author contributions**

455 YO, GH and IM conceptualized the initial idea; YO and IM performed the data  
456 collections; AT, HB, AW and JT arranged the data collection in the wild; YO performed  
457 and interpreted the statistical analyses; YO and IM drafted the manuscript; all authors  
458 contributed to the final version of the manuscript.

459

#### 460 **Competing interests**

461 The authors declare that they have no competing interests.

462

#### 463 **Data availability statement**

464 Data in support of the findings of this study are available from the corresponding  
465 authors by reasonable request.

466

#### 467 **References**

- 468 1 Helfield, J. M. & Naiman, R. J. Keystone Interactions: Salmon and Bear in  
469 Riparian Forests of Alaska. *Ecosystems* **9**, 167-180, doi:10.1007/s10021-004-0063-5  
470 (2006).
- 471 2 Smith, R. A. & Kennedy, M. L. Food habits of the racoon (*Procyon lotor*). *Journal of*  
472 *the Tennessee Academy of Science* **62**, 79-82 (1987).

- 473 3 Rees, E. E. *et al.* Assessing a landscape barrier using genetic simulation modelling:  
474 implications for raccoon rabies management. *Prev Vet Med* **86**, 107-123,  
475 doi:10.1016/j.prevetmed.2008.03.007 (2008).
- 476 4 Kempf, E. Patterns of water use in primates. *Folia Primatol (Basel)* **80**, 275-294,  
477 doi:10.1159/000252586 (2009).
- 478 5 Nowak, K., Barnett, A. A. & Matsuda, I. *Primates in Flooded Habitats: Ecology and*  
479 *Conservation*. (Cambridge University Press, 2019).
- 480 6 Matsuda, I. *et al.* in *Primates in Flooded Habitats: Ecology and Conservation*  
481 (eds Katarzyna Nowak, Adrian A. Barnett, & Ikki Matsuda) 15-28 (Cambridge  
482 University Press, 2019).
- 483 7 van Schaik, C. P. & Mirmanto, E. Spatial variation in the structure and litterfall of  
484 a Sumatran rain forest. *Biotropica* **17**, 196–205, doi:10.2307/2388217 (1985).
- 485 8 Coley, P. D. Interspecific variation in plant anti-herbivore properties: the role of  
486 habitat quality and rate of disturbance. *New Phytologist* **106**, 251-263,  
487 doi:10.1111/j.1469-8137.1987.tb04693.x (1987).
- 488 9 Chapman, C. A., Chapman, L. J., Naughton-Treves, L., Lawes, M. J. & McDowell, L.  
489 R. Predicting folivorous primate abundance: validation of a nutritional model. *Am J*  
490 *Primatol* **62**, 55–69, doi:10.1002/ajp.20006 (2004).
- 491 10 Matsuda, I., Tuuga, A., Bernard, H., Sugau, J. & Hanya, G. Leaf selection by two  
492 Bornean colobine monkeys in relation to plant chemistry and abundance. *Scientific*  
493 *Reports* **3**, 1873, doi:10.1038/srep01873 (2013).
- 494 11 Hanya, G., Kiyono, M., Takafumi, H., Tsujino, R. & Agetsuma, N. Mature leaf  
495 selection of Japanese macaques: effects of availability and chemical content.  
496 *Journal of Zoology* **273**, 140-147, doi:10.1111/j.1469-7998.2007.00308.x (2007).

- 497 12 Laundré, J. W., Hernández, L. & Altendorf, K. B. Wolves, elk, and bison:  
498 reestablishing the "landscape of fear" in Yellowstone National Park, U.S.A.  
499 *Canadian Journal of Zoology* **79**, 1401-1409, doi:10.1139/z01-094 (2001).
- 500 13 Altendorf, K. B., Laundré, J. W., López González, C. A. & Brown, J. S. Assessing  
501 Effects of Predation Risk on Foraging Behavior of Mule Deer. *Journal of*  
502 *Mammalogy* **82**, 430-439, doi:10.1644/1545-1542(2001)082<0430:aeopro>2.0.co;2  
503 (2001).
- 504 14 Laundré, J. W., Hernandez, L. & Ripple, W. J. The landscape of fear: ecological  
505 implications of being afraid. *The Open Ecology Journal* **3**, 1-7,  
506 doi:10.2174/1874213001003030001 (2010).
- 507 15 Gautier-Hion, A. in *Comparative Ecology and Behaviour of Primates: Proceedings of*  
508 *a Conference held at the Zoological Society* (eds R.P. Michael & J.H. Crook)  
509 147–170 (Academic Press, 1973).
- 510 16 van Schaik, C. P., van Amerongen, A. & van Noordwijk, M. A. in *Evolution and*  
511 *ecology of macaque societies* (eds J.A. Fa & D.G. Lindburg) 160-181  
512 (Cambridge University Press, 1996).
- 513 17 Matsuda, I., Tuuga, A. & Bernard, H. Riverine refuging by proboscis monkeys  
514 (*Nasalis larvatus*) and sympatric primates: Implications for adaptive benefits of the  
515 riverine habitat. *Mammalian Biology* **76**, 165-171,  
516 doi:10.1016/j.mambio.2010.03.005 (2011).
- 517 18 Albert, A., Savini, T. & Huynen, M. C. Sleeping site selection and presleep behavior  
518 in wild pigtailed macaques. *Am J Primatol* **73**, 1222-1230, doi:10.1002/ajp.20993  
519 (2011).
- 520 19 Matsuda, I., Tuuga, A. & Higashi, S. Clouded leopard (*Neofelis diardi*) predation on

- 521 proboscis monkeys (*Nasalis larvatus*) in Sabah, Malaysia. *Primates* **49**, 227-231,  
522 doi:10.1007/s10329-008-0085-2 (2008).
- 523 20 Otani, Y., Tuuga, A., Bernard, H. & Matsuda, I. Opportunistic predation and  
524 predation-related events on long-tailed macaque and proboscis monkey in  
525 Kinabatangan, Sabah, Malaysia. *Journal of Tropical Biology and Conservation* **9**,  
526 214-218 (2012).
- 527 21 Matsuda, I., Tuuga, A., Akiyama, Y. & Higashi, S. Selection of river crossing location  
528 and sleeping site by proboscis monkeys (*Nasalis larvatus*) in Sabah, Malaysia. *Am J*  
529 *Primatol* **70**, 1097-1101, doi:10.1002/ajp.20604 (2008).
- 530 22 Ross, J., Hearn, A. J., Johnson, P. J. & Macdonald, D. W. Activity patterns and  
531 temporal avoidance by prey in response to Sunda clouded leopard predation risk.  
532 *Journal of Zoology* **290**, 96-106, doi:10.1111/jzo.12018 (2013).
- 533 23 Matsuda, I., Tuuga, A. & Higashi, S. Effects of water level on sleeping-site selection  
534 and inter-group association in proboscis monkeys: why do they sleep alone inland  
535 on flooded days? *Ecological Research* **25**, 475-482, doi:10.1007/s11284-009-0677-3  
536 (2010).
- 537 24 Mittermeier, R. A., Rylands, A. B. & Wilson, D. E. *Handbook of the mammals of the*  
538 *world. Vol. 3. Primates.* (Lynx Edicions, 2013).
- 539 25 Kurland, J. A. A natural history of kra macaques (*Macaca fascicularis* Raffles, 1821)  
540 at the Kutai Reserve, Kalimantan Timur, Indonesia. *Primates* **14**, 245-262,  
541 doi:10.1007/bf01730823 (1973).
- 542 26 Yeager, C. P. Feeding ecology of the long-tailed macaque (*Macaca fascicularis*) in  
543 Kalimantan Tengah, Indonesia. *International Journal of Primatology* **17**, 51-62,  
544 doi:10.1007/bf02696158 (1996).

- 545 27 Choudhury, A. Ecology and behaviour of the pigtailed macaque *Macaca nemestrina*  
546 *leonina* in some forests of Assam in North-East India. *The journal of the Bombay*  
547 *Natural History Society* **105**, 279-291 (2008).
- 548 28 Albert, A. *Feeding and ranging behavior of northern pigtailed macaques (Macaca*  
549 *leonina): impact on their seed dispersal effectiveness and ecological contribution in*  
550 *a tropical rainforest at Khao Yai National Park, Thailand* PhD. thesis thesis,  
551 Université de Liège, (2012).
- 552 29 Caldecott, J. O. *An ecological and behavioural study of the pig-tailed macaque*. Vol.  
553 21 262 (Karger, 1985).
- 554 30 Gazagne, E. *et al.* When Northern Pigtailed Macaques (*Macaca leonina*) Cannot  
555 Select for Ideal Sleeping Sites in a Degraded Habitat. *International Journal of*  
556 *Primatology* **41**, 614-633, doi:10.1007/s10764-020-00173-4 (2020).
- 557 31 Rodman, P. S. Structural differentiation of microhabitats of sympatric *Macaca*  
558 *fascicularis* and *M. nemestrina* in East Kalimantan, Indonesia. *International*  
559 *Journal of Primatology* **12**, 357-375, doi:10.1007/bf02547617 (1991).
- 560 32 Matsuda, I., Otani, Y., Bernard, H., Wong, A. & Tuuga, A. Primate Survey in a  
561 Bornean Flooded Forest: Evaluation of Best Approach and Best Timing. *Mammal*  
562 *Study* **41**, 101-106, doi:10.3106/041.041.0201 (2016).
- 563 33 Alexander, R. D. The evolution of social behavior. *Annual Review of Ecology and*  
564 *Systematics* **5**, 325-383, doi:10.1146/annurev.es.05.110174.001545 (1974).
- 565 34 Cheney, D. L. & Wrangham, R. W. in *Primate societies* (eds B.B Smuts *et al.*)  
566 227–239 (University of Chicago Press, 1987).
- 567 35 Hill, R. A. & Lee, P. C. Predation risk as an influence on group size in cercopithecoid  
568 primates: implications for social structure. *Journal of Zoology* **245**, 447-456,



- 569 doi:10.1111/j.1469-7998.1998.tb00119.x (1998).
- 570 36 Oi, T. Population organization of wild pig-tailed macaques (*Macaca nemestrina*  
571 *nemestrina*) in West Sumatra. *Primates* **31**, 15-31, doi:10.1007/bf02381027 (1990).
- 572 37 Sackett, G. P., Ruppenthal, G. C. & Davis, A. E. Survival, growth, health, and  
573 reproduction following nursery rearing compared with mother rearing in pigtailed  
574 monkeys (*Macaca nemestrina*). *Am J Primatol* **56**, 165-183, doi:10.1002/ajp.1072  
575 (2002).
- 576 38 Gouzoules, H. & Gouzoules, S. Body size effects on the acoustic structure of pigtail  
577 macaque (*Macaca nemestrina*) screams. *Ethology* **85**, 324-334, doi:10.1111/j.1439-  
578 0310.1990.tb00411.x (2010).
- 579 39 Matsuda, I. *et al.* The nose is mightier than the tooth: larger male proboscis  
580 monkeys have smaller canines. *bioRxiv*, doi:10.1101/848515 (2019).
- 581 40 Matsuda, I., Tuuga, A. & Higashi, S. The feeding ecology and activity budget of  
582 proboscis monkeys. *American journal of primatology* **71**, 478-492,  
583 doi:10.1002/ajp.20677 (2009).
- 584 41 Matsuda, I., Kubo, T., Tuuga, A. & Higashi, S. A Bayesian analysis of the temporal  
585 change of local density of proboscis monkeys: implications for environmental effects  
586 on a multilevel society. *Am J Phys Anthropol* **142**, 235-245, doi:10.1002/ajpa.21218  
587 (2010).
- 588 42 Altmann, J. Observational study of behavior: sampling methods. *Behaviour* **49**,  
589 227-267, doi:10.1163/156853974x00534. (1974).
- 590 43 Kumar, D., Kumar, S., Gupta, J., Arya, R. & Gupta, A. A review on chemical and  
591 biological properties of *Cayratia trifolia* Linn. (Vitaceae). *Pharmacogn Rev* **5**, 184-  
592 188, doi:10.4103/0973-7847.91117 (2011).

- 593 44 Cleveland, R. B., Cleveland, W. S., McRae, J. E. & Terpenning, I. STL: a seasonal-  
594 trend decomposition procedure based on loess. *Journal of official statistics* **6**, 3-73  
595 (1990).
- 596 45 Driver, C. C., Oud, J. H. L. & Voelkle, M. C. Continuous time structural equation  
597 modeling with R Package ctsem. *Journal of Statistical Software* **77**,  
598 doi:10.18637/jss.v077.i05 (2017).
- 599 46 Driver, C. C. & Voelkle, M. C. Hierarchical Bayesian continuous time dynamic  
600 modeling. *Psychol Methods* **23**, 774-799, doi:10.1037/met0000168 (2018).
- 601 47 R: a language and environment for statistical computing (Foundation for Statistical  
602 Computing, Vienna, 2019).
- 603 48 Tsuji, Y., Hanya, G. & Grueter, C. C. Feeding strategies of primates in temperate  
604 and alpine forests: comparison of Asian macaques and colobines. *Primates*,  
605 doi:10.1007/s10329-013-0359-1 (2013).
- 606 49 Campbell, C. J., Fuentes, A., MacKinnon, K. C., Bearder, S. K. & Stumpf, R. M.  
607 *Primates in perspective*. 852 (Oxford University Press, 2011).
- 608 50 Smith, J. A., Donadio, E., Pauli, J. N., Sheriff, M. J. & Middleton, A. D. Integrating  
609 temporal refugia into landscapes of fear: prey exploit predator downtimes to forage  
610 in risky places. *Oecologia* **189**, 883-890, doi:10.1007/s00442-019-04381-5 (2019).
- 611 51 Miller, L. E. & Treves, A. in *Primates in perspective* (eds C.J. Campbell *et al.*)  
612 525–543 (Oxford University Press, 2007).
- 613 52 Galdikas, B. M. F. & Yeager, C. P. Brief report: Crocodile predation on a crab-eating  
614 macaque in Borneo. *Am J Primatol* **6**, 49-51, doi:10.1002/ajp.1350060106 (1984).
- 615 53 van Schaik, C. P., van Noordwijk, M. A., Warsono, B. & Sutriyono, E. Party size and  
616 early detection of predators in sumatran forest primates. *Primates* **24**, 211-221,

- 617 doi:10.1007/bf02381083 (1983).
- 618 54 Khamcha, D. & Sukumal, N. Burmese python (*Python molurus*) predation on a pig-  
619 tailed macaque (*Macaca nemestrina*) in Khao Yai National Park. *Hamadryad* **34**,  
620 176-178, doi:10.13140/2.1.3857.7449 (2009).
- 621 55 van Schaik, C. & Mitrasetia, T. Changes in the behaviour of wild long-tailed  
622 macaques (*Macaca fascicularis*) after encounters with a model python. *Folia*  
623 *Primatol (Basel)* **55**, 104-108, doi:10.1159/000156506 (1990).
- 624 56 Terborgh, J. Mixed flocks and polyspecific associations: Costs and benefits of mixed  
625 groups to birds and monkeys. *Am J Primatol* **21**, 87-100,  
626 doi:10.1002/ajp.1350210203 (1990).
- 627 57 Hart, D. in *Primate Anti-Predator Strategies, Developments in Primatology: Progress and Prospects* (eds S.L. Gursky & K.A.I. Nekaris) 27–59 (Springer US,  
628 2007).
- 629
- 630 58 Fam, S. D. & Nijman, V. *Spizaetus* hawk-eagles as predators of arboreal colobines.  
631 *Primates* **52**, 105-110, doi:10.1007/s10329-011-0240-z (2011).
- 632 59 Prawiradilaga, D. M. Ecology and conservation of endangered Javan Hawk-eagle  
633 *Spizaetus bartelsi*. *Ornithological Science* **5**, 177-186, doi:10.2326/1347-  
634 0558(2006)5[177:eacoej]2.0.co;2 (2006).
- 635 60 Yeager, C. P. Possible antipredator behavior associated with river crossings by  
636 proboscis monkeys (*Nasalis larvatus*). *American Journal of Primatology* **24**, 61-66,  
637 doi:10.1002/ajp.1350240107 (1991).
- 638 61 van Schaik, C. P. & van Hooff, J. A. R. A. M. On the ultimate causes of primate  
639 social systems. *Behaviour* **85**, 91-117, doi:10.1163/156853983x00057 (1983).
- 640 62 Anderson, J. R. Sleep, sleeping sites, and sleep-related activities: Awakening to

- 641 their significance. *American Journal of Primatology* **46**, 63–75,  
642 doi:10.1002/(sici)1098-2345(1998)46:1<63::aid-ajp5>3.0.co;2-t (1998).
- 643 63 Chapman, C. A., Chapman, L. J. & McLaughlin, R. L. Multiple central place  
644 foraging by spider monkeys: travel consequences of using many sleeping sites.  
645 *Oecologia* **79**, 506-511, doi:10.1007/BF00378668 (1989).
- 646 64 Teichroeb, J. A., Holmes, T. D. & Sicotte, P. Use of sleeping trees by ursine colobus  
647 monkeys (*Colobus vellerosus*) demonstrates the importance of nearby food.  
648 *Primates* **53**, 287-296, doi:10.1007/s10329-012-0299-1 (2012).
- 649 65 Vessey, S. H. Night observations of free-ranging Rhesus monkeys. *Am J Phys*  
650 *Anthropol* **38**, 613-619, doi:10.1002/ajpa.1330380276 (1973).
- 651 66 Dasilva, G. L. Postural changes and behavioural thermoregulation in *Colobus*  
652 *polykomos*: the effect of climate and diet. *African Journal of Ecology* **31**, 226-241,  
653 doi:10.1111/j.1365-2028.1993.tb00536.x (1993).
- 654 67 Rodman, P. S. Skeletal differentiation of *Macaca fascicularis* and *Macaca*  
655 *nemestrina* in relation to arboreal and terrestrial quadrupedalism. *American*  
656 *Journal of Physical Anthropology* **51**, 51-62, doi:10.1002/ajpa.1330510107 (1979).  
657

658 **Table and Figure legends**

659 Table 1. Summary of detection events and the number of individuals sightings during  
660 boat-based surveys (n = 434 days).

661 Table 2. Food items and parts consumed by southern pig-tailed and long-tailed  
662 macaques with their observed frequency during boat-based surveys.

663 Table 3. Means, standard deviations (SD) and posterior credibility intervals (PCI) of the  
664 CtSEM model. Asterisks (\*) indicate that zero does not falls within the PCIs, i.e.,  
665 positive or negative effects are indicated.

666 Figure 1. Decomposition plot of abundance of *Cayratia trifolia* fruits based on Seasonal  
667 decomposition of time series by loess (STL). Numbers of *C. trifolia* fruits are  
668 represented on the y-axis. Trend and seasonality indicate a relatively steady  
669 increase or decrease over time, and a pattern that repeats, respectively.

670 Figure 2. Auto-regressive effects plotted for time intervals of  $0 < \Delta t < 10$  months.  
671 Parameters represent within-section persistence of the number of *Cayratia trifolia*  
672 fruits, and the sighting frequency of pig-tailed and long-tailed macaques over time.  
673 Solid lines represent auto-regressive effects for the number of *C. trifolia* fruits  
674 over time, and dashed lines represents auto-regressive effects for the sighting  
675 frequency of pig-tailed (a) and long-tailed macaques (b).

Table 1. Summary of detection events and the number of individual sightings during boat-based surveys (n = 434 days).

|                                                     | Pig-tailed<br>macaque | Long-tailed<br>macaque | Proboscis<br>monkey | Silver<br>langur | Maroon<br>langur | Orangutan       |
|-----------------------------------------------------|-----------------------|------------------------|---------------------|------------------|------------------|-----------------|
| Total number of discovery<br>event (times)          | 442                   | 1357                   | 1278                | 44               | 1                | 67              |
| Total number of individual<br>sighting (head)       | 10257                 | 14785                  | 14393               | 344              | 6                | 122             |
| Averaged individual<br>sighting (head/day $\pm$ SD) | 23.63 $\pm$ 24.07     | 34.07 $\pm$ 23.05      | 33.16 $\pm$ 23.86   | 0.79 $\pm$ 2.67  | 0.01 $\pm$ 0.29  | 0.28 $\pm$ 0.91 |

Table 2. Food items and parts consumed by southern pig-tailed and long-tailed macaques with their observed frequency during boat-based surveys.

| Species                            | Type   | Pig-tailed macaque         |       | Long-tailed macaque        |       |
|------------------------------------|--------|----------------------------|-------|----------------------------|-------|
|                                    |        | Number of observation time | %     | Number of observation time | %     |
| <i>Albizia corniculata</i>         | fruit  | 1                          | 1.52  |                            |       |
|                                    | unkown | 1                          | 1.52  |                            |       |
| <i>Antidesma thwaitesianum</i>     | flower |                            |       | 10                         | 3.61  |
|                                    | fruit  |                            |       | 2                          | 0.72  |
|                                    | leaf   |                            |       | 1                          | 0.36  |
| <i>Baccaurea stipulata</i>         | fruit  | 1                          | 1.52  |                            |       |
| <i>Cayratia trifolia</i>           | fruit  | 15                         | 22.73 | 141                        | 50.90 |
|                                    | leaf   |                            |       | 9                          | 3.25  |
| <i>Dillenia excelsa</i>            | flower | 24                         | 36.36 | 45                         | 16.25 |
|                                    | fruit  | 4                          | 6.06  | 7                          | 2.53  |
|                                    | leaf   |                            |       | 2                          | 0.72  |
|                                    | unkown |                            |       | 1                          | 0.36  |
| <i>Eichhornia crassipes</i>        | stem   |                            |       | 2                          | 0.72  |
| <i>Ficus</i> sp.                   | fruit  | 2                          | 3.03  | 4                          | 1.44  |
| <i>Gnetum gnemonoides</i>          | fruit  |                            |       | 1                          | 0.36  |
| <i>Mallotus muticus</i>            | flower | 1                          | 1.52  | 3                          | 1.08  |
|                                    | fruit  | 3                          | 4.55  | 8                          | 2.89  |
|                                    | leaf   | 1                          | 1.52  | 7                          | 2.53  |
|                                    | unkown |                            |       | 1                          | 0.36  |
| <i>Nauclea subdita</i>             | flower |                            |       | 1                          | 0.36  |
|                                    | leaf   | 1                          | 1.52  |                            |       |
| <i>Pternandra galeata</i>          | fruit  | 1                          | 1.52  | 2                          | 0.72  |
|                                    | leaf   |                            |       | 2                          | 0.72  |
| <i>Spatholobus cf. macropterus</i> | leaf   |                            |       | 1                          | 0.36  |
| <i>Vitex pinnata</i>               | fruit  |                            |       | 1                          | 0.36  |
| <i>Xylosma sumatrana</i>           | flower |                            |       | 5                          | 1.81  |
| <i>Ziziphus bornensis</i>          | fruit  | 1                          | 1.52  |                            |       |
| unkown                             | flower | 6                          | 9.09  | 16                         | 5.78  |
|                                    | fruit  | 2                          | 3.03  | 4                          | 1.44  |
|                                    | leaf   | 2                          | 3.03  | 1                          | 0.36  |
| Total                              |        | 66                         |       | 277                        |       |

Table 3. Means, standard deviations (SD) and posterior credibility intervals (PCI) of the CtSEM model.

| Parameter                                    | Dependent Process         |       |                      |                            |       |                      |                                           |       |                      |
|----------------------------------------------|---------------------------|-------|----------------------|----------------------------|-------|----------------------|-------------------------------------------|-------|----------------------|
|                                              | Mean number of pig-tailed |       |                      | Mean number of long-tailed |       |                      | Amount of <i>Cayratia trifolia</i> fruits |       |                      |
|                                              | mean                      | SD    | PCI<br>[2.5%, 97.5%] | mean                       | SD    | PCI<br>[2.5%, 97.5%] | mean                                      | SD    | PCI<br>[2.5%, 97.5%] |
| $T_0$ mean                                   | 0.408                     | 0.253 | -0.089, 0.911        | 0.313                      | 0.251 | -0.199, 0.783        | 0.270                                     | 0.262 | -0.230, 0.805        |
| Manifest means                               | -0.021                    | 0.129 | -0.277, 0.233        | -0.030                     | 0.078 | -0.192, 0.188        | -0.011                                    | 0.100 | -0.211, 0.184        |
| <b>Drift Parameters</b>                      |                           |       |                      |                            |       |                      |                                           |       |                      |
| Mean number of pig-tailed                    |                           | –     |                      | 0.984                      | 0.367 | 0.356, 1.802 *       | 0.557                                     | 0.446 | -0.264, 1.486        |
| Mean number of long-tailed                   | 0.753                     | 0.281 | 0.272, 1.373 *       |                            | –     |                      | 0.101                                     | 0.215 | -0.309, 0.527        |
| Amount of <i>Cayratia trifolia</i> fruits    | 1.560                     | 0.653 | 0.131, 2.710 *       | 0.850                      | 0.148 | 0.581, 1.167 *       |                                           | –     |                      |
| <b>Effect of time dependent parameters</b>   |                           |       |                      |                            |       |                      |                                           |       |                      |
| Rainfall                                     | 0.008                     | 0.054 | -0.098, 0.115        | -0.022                     | 0.049 | -0.119, 0.075        | 0.020                                     | 0.053 | -0.084, 0.124        |
| Water level                                  | -0.179                    | 0.052 | -0.282, -0.077 *     | -0.110                     | 0.049 | -0.205, -0.011 *     | -0.174                                    | 0.053 | -0.278, -0.071 *     |
| <b>Effect of time independent parameters</b> |                           |       |                      |                            |       |                      |                                           |       |                      |
| River width                                  | -0.466                    | 0.257 | -0.971, 0.045        | -0.155                     | 0.259 | -0.638, 0.365        | -0.225                                    | 0.258 | -0.779, 0.245        |

Asterisks (\*) indicate that zero does not falls within the PCIs, i.e., positive or negative effects are indicated.



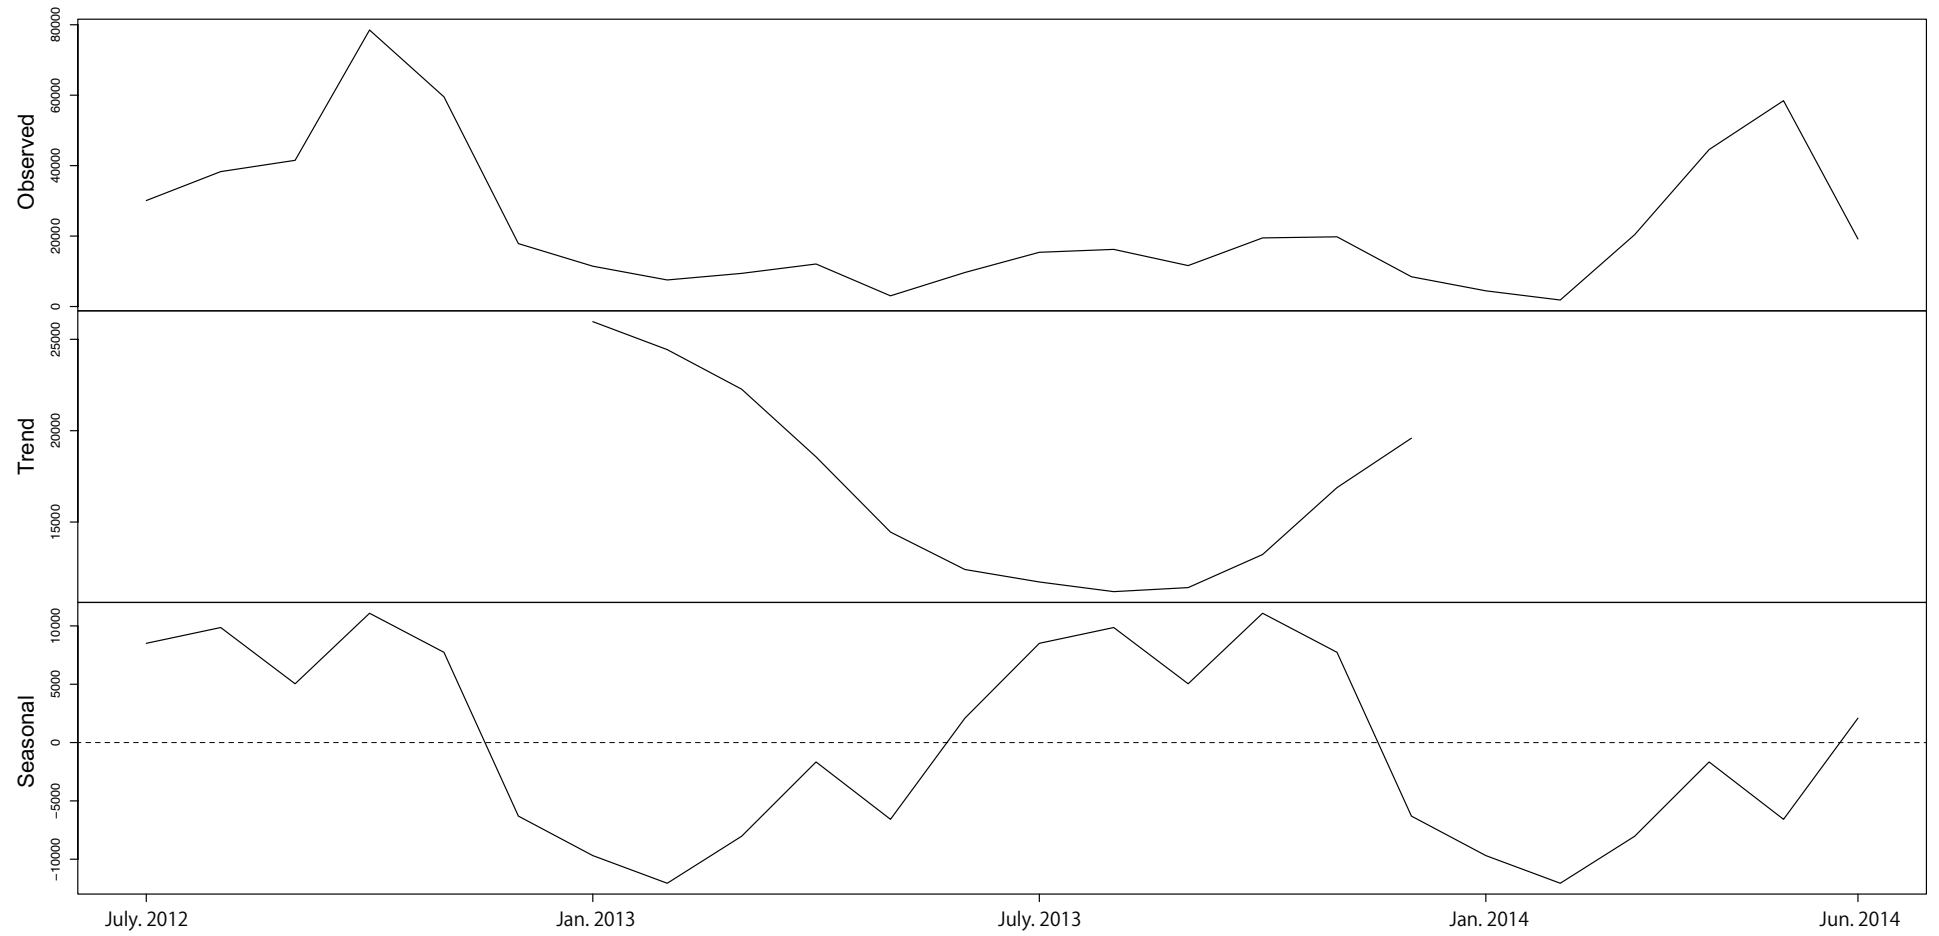

Fig. 1

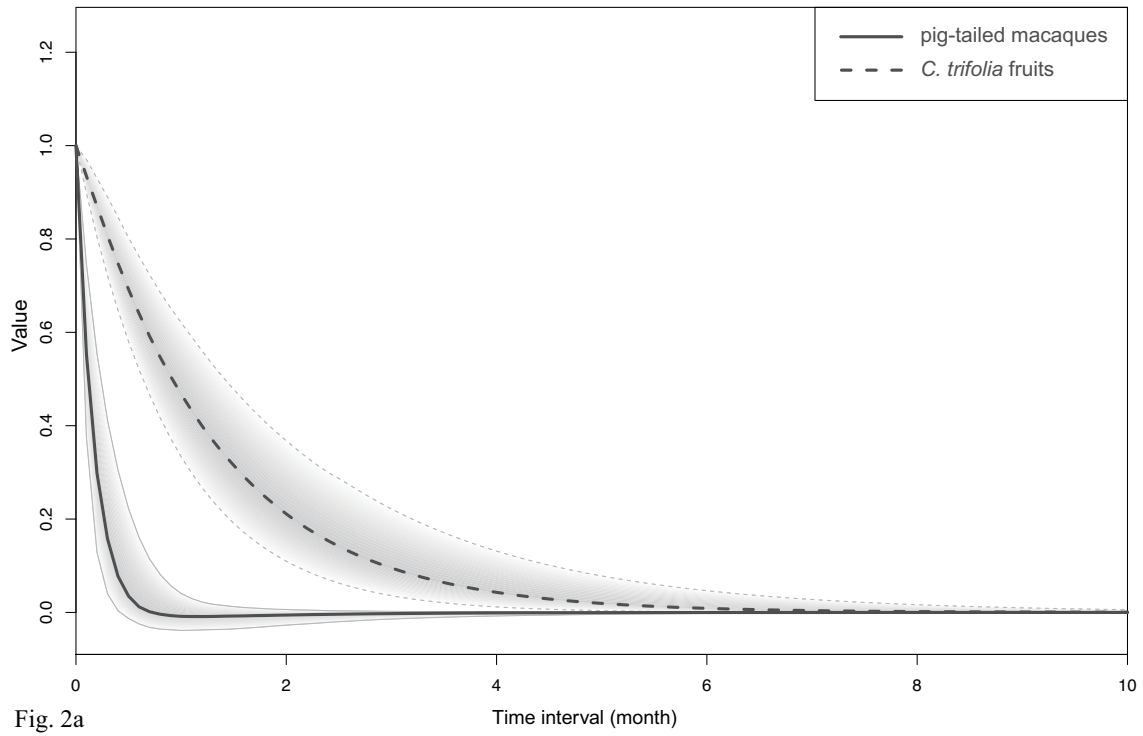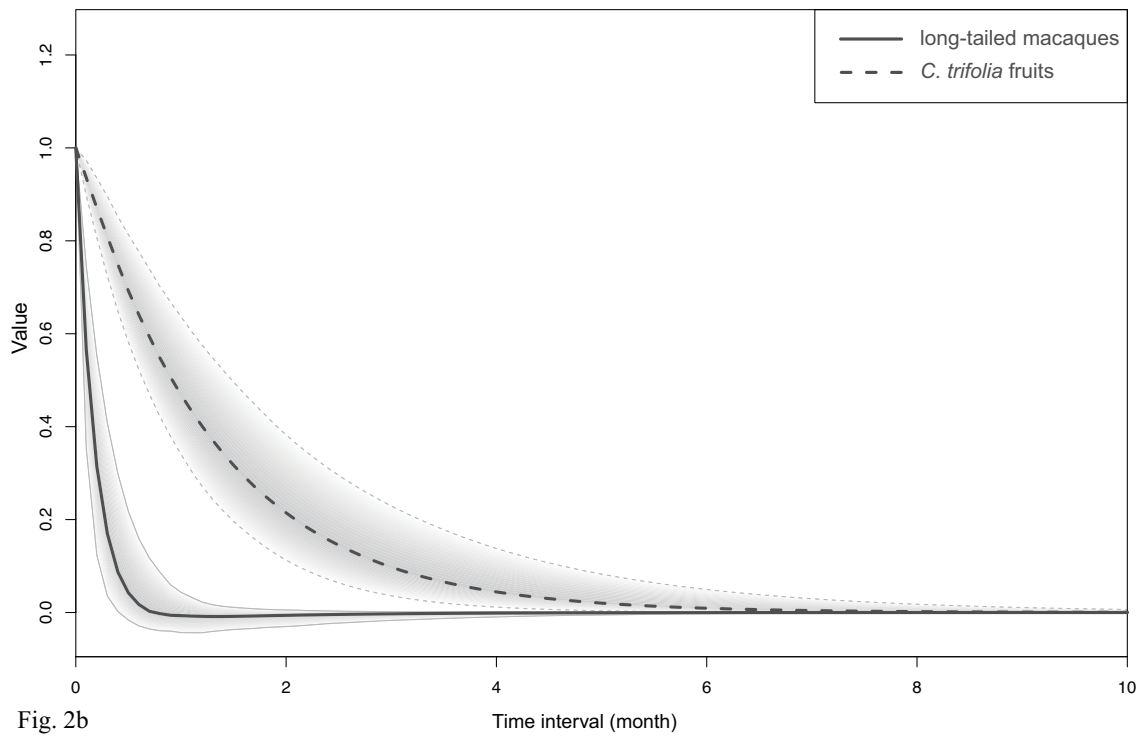

Source: https://www.biorxiv.org/content/10.1101/2020.06.11.145409v2.full.pdf
